# Supplementary material
Source: Springer Nature journal article supplement (https://www.springermedizin.de/resource/supplementary/12865_2012_512_MOESM2_ESM.pdf/9428212)

A

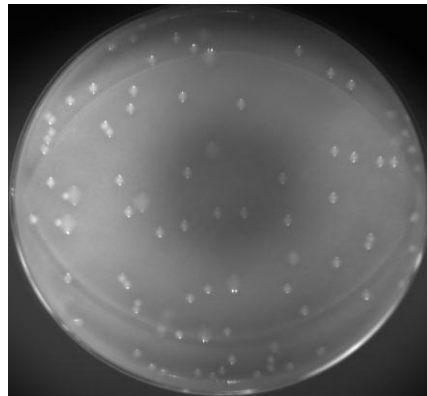

OVA/P.a.

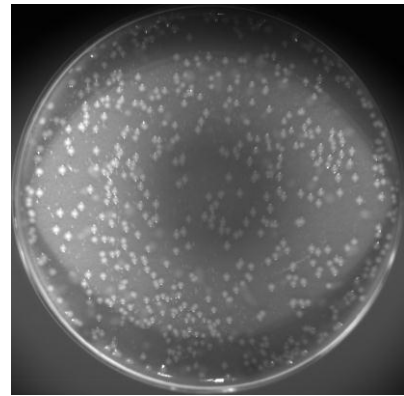

OVA/Bud/P.a.

B

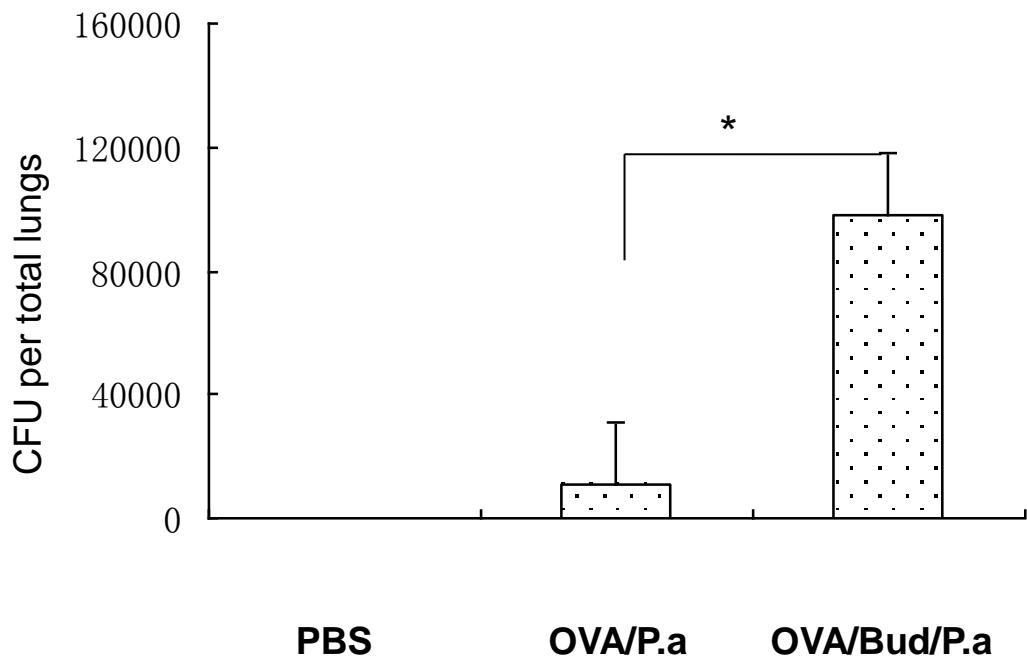

Supplement: MOESM2 [file 9428212]
